# Supplementary material for: Identification and characterization of a SARS-CoV-2 specific CD8+ T cell response with immunodominant features
Source: PubMed Central journal article supplement (PMC8110804; doi:10.1038/s41467-021-22811-y), 2021-05-10
Supplement: 41467_2021_22811_MOESM3_ESM.pdf [file 41467_2021_22811_MOESM3_ESM.pdf]

## Descriptions of Additional Supplementary Files

### **Supplementary data 1**

**Description:** List of epitopes used for the identification of SARS-CoV-2-specific CD8 T cells.

### **Supplementary data 2**

**Description:** Differential gene expression of Louvain clusters.

### **Supplementary data 3**

**Description:** Gene signatures used to identify CD8 T cell differentiation states.

### **Supplementary data 4**

**Description:** Differential gene expression and gene ontology of TTD-specific vs bulk naïve CD8 T cells.

### **Supplementary data 5**

**Description:** Differential gene expression of TTD-specific vs bulk non-naïve CD8 T cells.
